# Supplementary material for: MALDI-TOF Mass Spectrometry-Based Identification of Aerobic Mesophilic Bacteria in Raw Unpreserved and Preserved Milk
Source: MDPI journal article supplement (doi:10.3390/pr12040731), 2024-04-04
Supplement: s1 [file s1]

**Table S1.** Total species identified in raw unpreserved milk sample using MALDI-TOF MS.

| Batch 1                               |       | Batch 2                               |       | Batch 3                               |       | Batch 4                             |       |
|---------------------------------------|-------|---------------------------------------|-------|---------------------------------------|-------|-------------------------------------|-------|
| Organism name                         | Count | Organism name                         | Count | Organism name                         | Count | Organism name                       | Count |
| <i>Chryseobacterium vrystaatense</i>  | 28    | <i>Lactococcus lactis</i>             | 25    | <i>Lactococcus garvieae</i>           | 16    | <i>Lactococcus lactis</i>           | 14    |
| <i>Serratia liquefaciens</i>          | 18    | <i>Acinetobacter johnsonii</i>        | 12    | <i>Lactococcus lactis</i>             | 11    | <i>Lactococcus garvieae</i>         | 10    |
| <i>Lactococcus lactis</i>             | 10    | <i>Enterococcus faecalis</i>          | 12    | <i>Chryseobacterium joostei</i>       | 7     | <i>Acinetobacter johnsonii</i>      | 6     |
| <i>Rhodococcus erythropolis</i>       | 10    | <i>Chryseobacterium vrystaatense</i>  | 5     | <i>Enterobacter cloacae</i>           | 7     | <i>Enterococcus faecalis</i>        | 6     |
| <i>Acinetobacter johnsonii</i>        | 8     | <i>Enterobacter cloacae</i>           | 3     | <i>Klebsiella pneumoniae</i>          | 4     | <i>Macrococcus caseolyticus</i>     | 3     |
| <i>Corynebacterium phoceense</i>      | 6     | <i>Microbacterium liquefaciens</i>    | 3     | <i>Acinetobacter johnsonii</i>        | 3     | <i>Microbacterium liquefaciens</i>  | 3     |
| <i>Ochrobactrum grignonense</i>       | 5     | <i>Aquamicrobium lusatiense</i>       | 2     | <i>Raoultella ornithinolytica</i>     | 3     | <i>Stenotrophomonas maltophilia</i> | 3     |
| <i>Acinetobacter guillouiae</i>       | 4     | <i>Corynebacterium xerosis</i>        | 2     | <i>Enterobacter asburiae</i>          | 2     | <i>Enterobacter cloacae</i>         | 2     |
| <i>Aerococcus viridans</i>            | 4     | <i>Microvirgula aerodenitrificans</i> | 2     | <i>Enterococcus faecalis</i>          | 2     | <i>Microbacterium maritypicum</i>   | 2     |
| <i>Alcaligenes faecalis</i>           | 4     | <i>Raoultella ornithinolytica</i>     | 2     | <i>Macrococcus caseolyticus</i>       | 2     | <i>Acinetobacter baumannii</i>      | 1     |
| <i>Microbacterium maritypicum</i>     | 4     | <i>Aerococcus viridans</i>            | 1     | <i>Pseudomonas putida</i>             | 2     | <i>Aquamicrobium lusatiense</i>     | 1     |
| <i>Brachybacterium nesterenkovi</i>   | 3     | <i>Chryseobacterium oncorhynchi</i>   | 1     | <i>Chryseobacterium spp</i>           | 1     | <i>Enterobacter bugandensis</i>     | 1     |
| <i>Corynebacterium casei</i>          | 3     | <i>Corynebacterium casei</i>          | 1     | <i>Chryseobacterium tractae</i>       | 1     | <i>Enterobacter ludwigii</i>        | 1     |
| <i>Eriwinia spp. *</i>                | 3     | <i>Enterobacter asburiae</i>          | 1     | <i>Citrobacter braakii</i>            | 1     | <i>Enterobacter spp. *</i>          | 1     |
| <i>Corynebacterium xerosis</i>        | 2     | <i>Lactobacillus curvatus</i>         | 1     | <i>Corynebacterium casei</i>          | 1     | <i>Klebsiella oxytoca</i>           | 1     |
| <i>Klebsiella oxytoca</i>             | 2     | <i>Moraxella osloensis</i>            | 1     | <i>Corynebacterium spp. *</i>         | 1     | <i>Moraxella osloensis</i>          | 1     |
| <i>Pseudoclavibacter helvolus</i>     | 2     | <i>Staphylococcus haemolyticus</i>    | 1     | <i>Corynebacterium variabile</i>      | 1     | <i>Raoultella ornithinolytica</i>   | 1     |
| <i>Pseudomonas oleovorans</i>         | 2     | <i>Staphylococcus hominis</i>         | 1     | <i>Enterobacter bugandensis</i>       | 1     | <i>Rhodococcus erythropolis</i>     | 1     |
| <i>Pseudomonas spp. *</i>             | 2     |                                       |       | <i>Enterobacter hormaechei</i>        | 1     |                                     |       |
| <i>Raoultella ornithinolytica</i>     | 2     |                                       |       | <i>Flavobacterium lindanitolerans</i> | 1     |                                     |       |
| <i>Acinetobacter lwoffii</i>          | 1     |                                       |       | <i>Klebsiella oxytoca</i>             | 1     |                                     |       |
| <i>Chryseobacterium rhizosphaerae</i> | 1     |                                       |       | <i>Microbacterium maritypicum</i>     | 1     |                                     |       |
| <i>Corynebacterium glutamicum</i>     | 1     |                                       |       | <i>Pseudomonas spp. *</i>             | 1     |                                     |       |
| <i>Enterobacter cloacae</i>           | 1     |                                       |       | <i>Rothia endophytica</i>             | 1     |                                     |       |
| <i>Massilia timonae</i>               | 1     |                                       |       | <i>Sphingobacterium multivorum</i>    | 1     |                                     |       |
| <i>Microbacterium liquefaciens</i>    | 1     |                                       |       | <i>Sphingobacterium spiritivorum</i>  | 1     |                                     |       |
| <i>Micrococcus luteus</i>             | 1     |                                       |       | <i>Sphingobacterium spp. *</i>        | 1     |                                     |       |
| <i>Pseudomonas stutzeri</i>           | 1     |                                       |       | <i>Stenotrophomonas maltophilia</i>   | 1     |                                     |       |
| <i>Rhodococcus baikonurensis</i>      | 1     |                                       |       | <i>Stenotrophomonas spp.</i>          | 1     |                                     |       |

\* the isolates were identified to the genus level.

**Table S2.** Total species identified in preserved milk using MALDI-TOF MS.

| Batch 1                                 |       | Batch 2                               |       | Batch 3                            |       | Batch 4                             |       |
|-----------------------------------------|-------|---------------------------------------|-------|------------------------------------|-------|-------------------------------------|-------|
| Organism name                           | Count | Organism name                         | Count | Organism name                      | Count | Organism name                       | Count |
| <i>Chryseobacterium vrystaatense</i>    | 47    | <i>Lactococcus lactis</i>             | 21    | <i>Lactococcus lactis</i>          | 19    | <i>Lactococcus lactis</i>           | 15    |
| <i>Lactococcus lactis</i>               | 21    | <i>Enterococcus faecalis</i>          | 11    | <i>Lactococcus garvieae</i>        | 12    | <i>Lactococcus garvieae</i>         | 10    |
| <i>Serratia liquefaciens</i>            | 16    | <i>Acinetobacter johnsonii</i>        | 4     | <i>Chryseobacterium joostei</i>    | 3     | <i>Macrococcus caseolyticus</i>     | 10    |
| <i>Acinetobacter johnsonii</i>          | 7     | <i>Chryseobacterium joostei</i>       | 3     | <i>Macrococcus caseolyticus</i>    | 3     | <i>Enterococcus faecalis</i>        | 8     |
| <i>Microbacterium maritypicum</i>       | 6     | <i>Chryseobacterium vrystaatense</i>  | 3     | <i>Acinetobacter guillouiae</i>    | 2     | <i>Acinetobacter johnsonii</i>      | 2     |
| <i>Corynebacterium casei</i>            | 3     | <i>Aerococcus viridans</i>            | 1     | <i>Enterobacter bugandensis</i>    | 2     | <i>Microbacterium maritypicum</i>   | 2     |
| <i>Corynebacterium phoceense</i>        | 3     | <i>Apiotrichum loubieri</i>           | 1     | <i>Enterobacter cloacae</i>        | 2     | <i>Stenotrophomonas maltophilia</i> | 2     |
| <i>Acinetobacter guillouiae</i>         | 2     | <i>Aquamicrobium lusatiense</i>       | 1     | <i>Enterococcus faecalis</i>       | 1     | <i>Acetobacter cibirongensis</i>    | 1     |
| <i>Aerococcus viridans</i>              | 2     | <i>Chryseobacterium ureilyticum</i>   | 1     | <i>Staphylococcus succinus</i>     | 1     | <i>Enterobacter cloacae</i>         | 1     |
| <i>Alcaligenes faecalis</i>             | 2     | <i>Corynebacterium spp. *</i>         | 1     | <i>Stenotrphomonas maltophilia</i> | 1     | <i>Enterobacter spp. *</i>          | 1     |
| <i>Chryseobacterium indoltheticum</i>   | 2     | <i>Enterobacter bugandensis</i>       | 1     |                                    |       | <i>Escherichia coli</i>             | 1     |
| <i>Corynebacterium confusum</i>         | 2     | <i>Enterococcus italicus</i>          | 1     |                                    |       | <i>Microbacterium liquefaciens</i>  | 1     |
| <i>Klebsiella oxytoca</i>               | 2     | <i>Lactobacillus curvatus</i>         | 1     |                                    |       | <i>Raoultella ornithinolytica</i>   | 1     |
| <i>Lactobacillus fructivorans</i>       | 2     | <i>Lactococcus garvieae</i>           | 1     |                                    |       | <i>Raoultella terrigena</i>         | 1     |
| <i>Ochrobactrum grignonense</i>         | 2     | <i>Macrococcus caseolyticus</i>       | 1     |                                    |       |                                     |       |
| <i>Carnobacterium maltaromaticum</i>    | 1     | <i>Microbacterium liquefaciens</i>    | 1     |                                    |       |                                     |       |
| <i>Corynebacterium frankenforstense</i> | 1     | <i>Microbacterium maritypicum</i>     | 1     |                                    |       |                                     |       |
| <i>Corynebacterium glutamicum</i>       | 1     | <i>Microbacterium oxydans</i>         | 1     |                                    |       |                                     |       |
| <i>Enterobacter cloacae</i>             | 1     | <i>Microvirgula aerodenitrificans</i> | 1     |                                    |       |                                     |       |
| <i>Erwinia spp. *</i>                   | 1     | <i>Rhodococcus erythropolis</i>       | 1     |                                    |       |                                     |       |
| <i>Ochrobactrum spp. *</i>              | 1     |                                       |       |                                    |       |                                     |       |
| <i>Pseudomonas spp. *</i>               | 1     |                                       |       |                                    |       |                                     |       |
| <i>Raoultella spp. *</i>                | 1     |                                       |       |                                    |       |                                     |       |
| <i>Sphingobacterium multivorum</i>      | 1     |                                       |       |                                    |       |                                     |       |
| <i>Stenotrophomonas maltophilia</i>     | 1     |                                       |       |                                    |       |                                     |       |
| <i>Streptococcus parauberis</i>         | 1     |                                       |       |                                    |       |                                     |       |

\* the isolates were identified to the genus level.
